# Supplementary material for: Ionic liquids as two-dimensional templates for the spontaneous assembly of copper nanoparticles into nanobelts and observation of an intermediate state
Source: Royal Society of Chemistry journal article supplement (doi:10.1039/c2ra22797e), 2012-11-08
Supplement: c2ra22797e.pdf [file c2ra22797e.pdf]

# Ionic liquids mediated self assembly of copper nanoparticles into nanobelts and optical monitoring

Xuqing Liu,<sup>a,b</sup> Yi Li,<sup>\*a</sup> Zijian Zheng<sup>a</sup> and Feng Zhou<sup>\*b</sup>

<sup>a</sup> Institute of Textiles and Clothing, The Hong Kong Polytechnic University, Hung Hom, Kowloon, Hong Kong SAR, China. Fax: +852-27731432; Tel: +852-27666479; E-mail: tcliyi@inet.polyu.edu.hk

<sup>b</sup> State Key Laboratory of Solid Lubrication, Lanzhou Institute of Chemical Physics, Chinese Academy of Sciences, Lanzhou 730000, China. Fax: +86 0931 8277088; Tel: +86 0931 4968466; E-mail: zhouf@licp.cas.cn

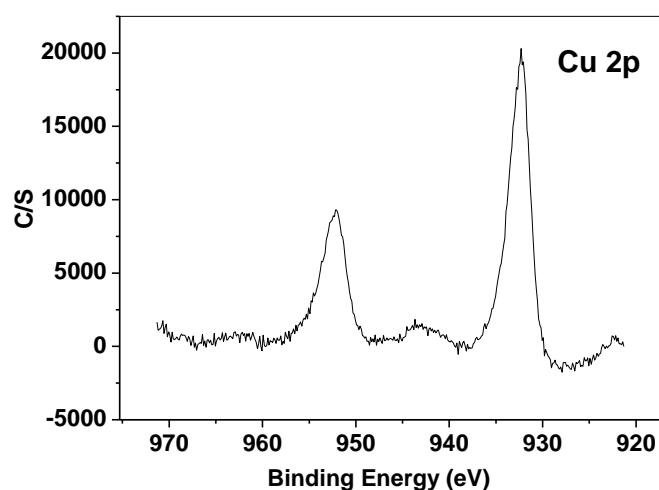

Supporting Figure 1. The XPS spectrum of copper nanobelts.

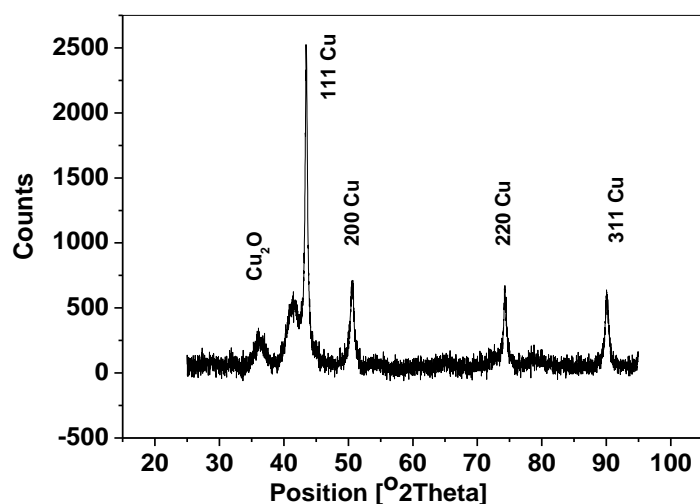

Supporting Figure. 2 XRD of synthesized copper nanostructures.

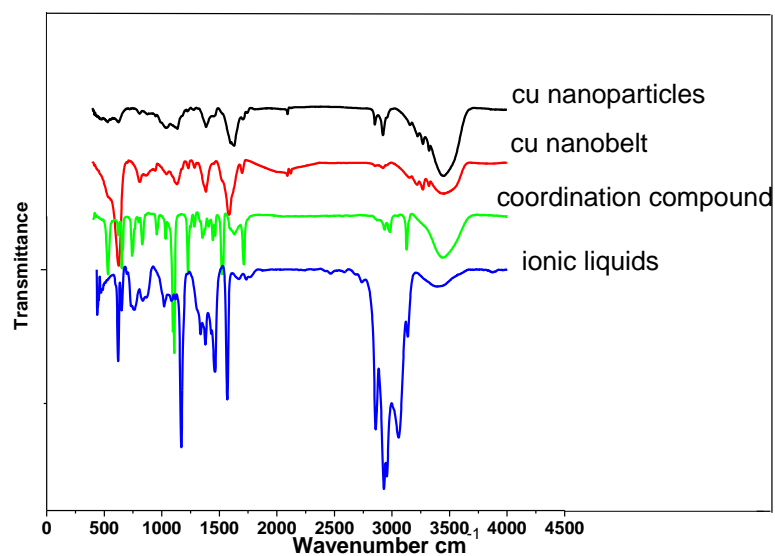

Supporting Figure 3. The IR spectra of the ionic liquid, the coordination compound of the ionic liquid with copper ions, copper nanoparticles, and copper nanobelts.

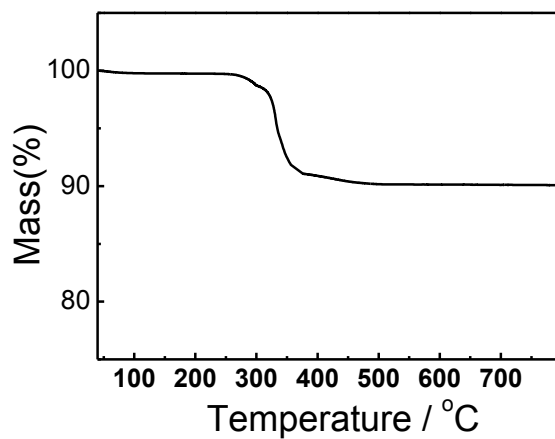

Supporting Figure 4. Thermo gravimetric analyze of the copper nanobelts
